# Supplementary material for: Halogen-bridged metal–organic frameworks constructed from bipyridinium-based ligand: structures, photochromism and non-destructive readout luminescence switching
Source: Royal Society of Chemistry journal article supplement (doi:10.1039/c5dt04539h), 2015-12-17
Supplement: c5dt04539h1.pdf [file c5dt04539h1.pdf]

## Supporting Information

### Halogen-bridged metal–organic frameworks constructed from bipyridinium-based ligand: structures, photochromism and non-destructive readout luminescence switching

Xiao-Dong Yang,<sup>a</sup> Cheng Chen,<sup>a</sup> Ya-Jun Zhang,<sup>a</sup> Li-Xuan Cai,<sup>a</sup> BinTan<sup>a</sup> and Jie Zhang<sup>\*ab</sup>

<sup>a</sup> State Key Laboratory of Structural Chemistry, Fujian Institute of Research on the Structure of Matter, Chinese Academy of Sciences, Fuzhou, Fujian 350002, P. R. China, E-mail: [zhangjie@fjirsm.ac.cn](mailto:zhangjie@fjirsm.ac.cn)

<sup>b</sup> MOE Key Laboratory of Cluster Science, School of Chemistry, Beijing Institute of Technology, Beijing 10081, P. R. China, E-mail: [zhangjie68@bit.edu.cn](mailto:zhangjie68@bit.edu.cn)

\*\*\*\*\*

#### Section 1. Kinetic rate calculations

The photochemical reactions of compounds **1** and **2** all exhibit first order kinetics which can be analyzed with eq<sup>[1]</sup>:

$$\ln\left(\frac{R_0 - R_\infty}{R_t - R_\infty}\right) = kt$$

where  $k$  is the first-order rate constant,  $R_0$ ,  $R_t$ ,  $R_\infty$  refer to the UV–vis diffuse reflectance intensity values (400nm for compound **1**, 410nm for compound **2**) at the beginning, versus time, and at the end of the reaction, respectively.

#### Reference

[1] J. Sworakowski, K. Janus and S. Nešpůrek, *Adv. Colloid Interface Sci.*, 2005, **116**, 97.

#### Section 2. Additional Data and Figures

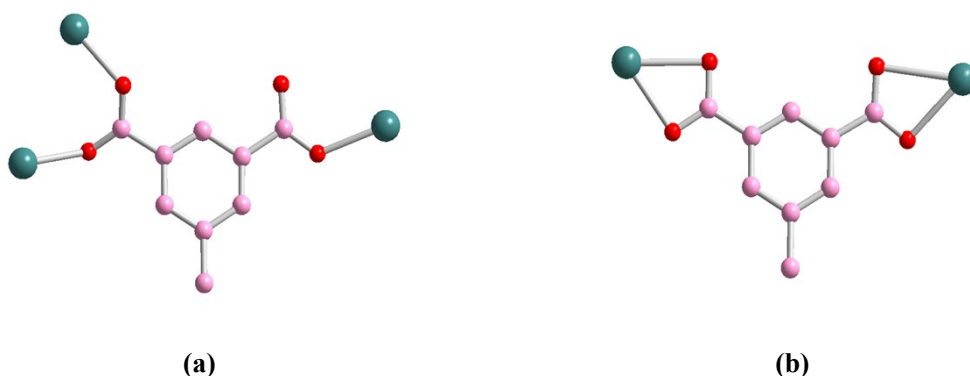

Fig.S1. The two coordination modes of the  $mip^{2-}$  ligands in compound **1**. (a) mode I:  $\mu_3-\eta^1:\eta^1:\eta^1:\eta^1$ ; (b) mode II:  $\mu_2-\eta^1:\eta^1:\eta^1:\eta^1$ .

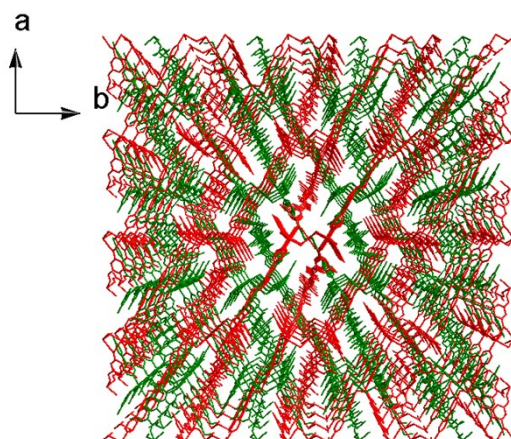

Fig.S2. The 2-fold interpenetrated structure in compound 1.

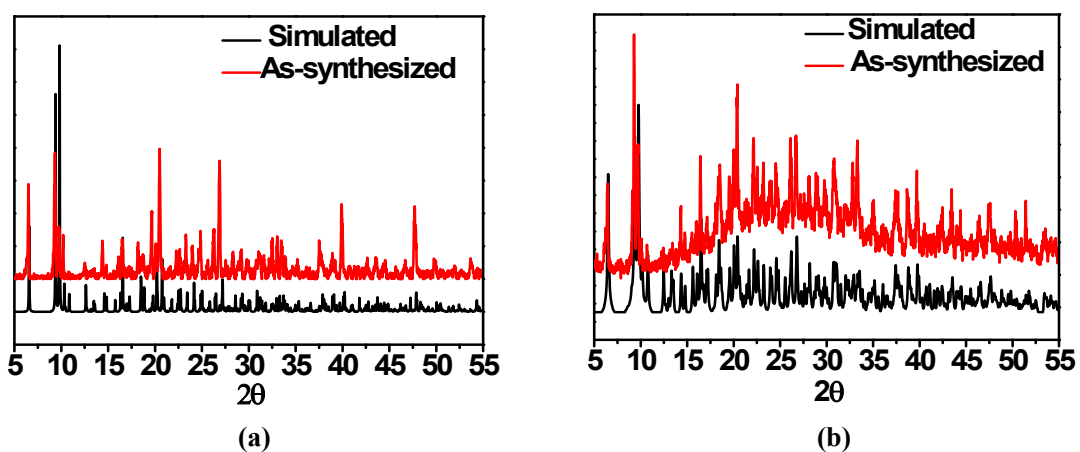

Fig.S3. PXRD patterns of compounds 1 (a) and 2 (b).

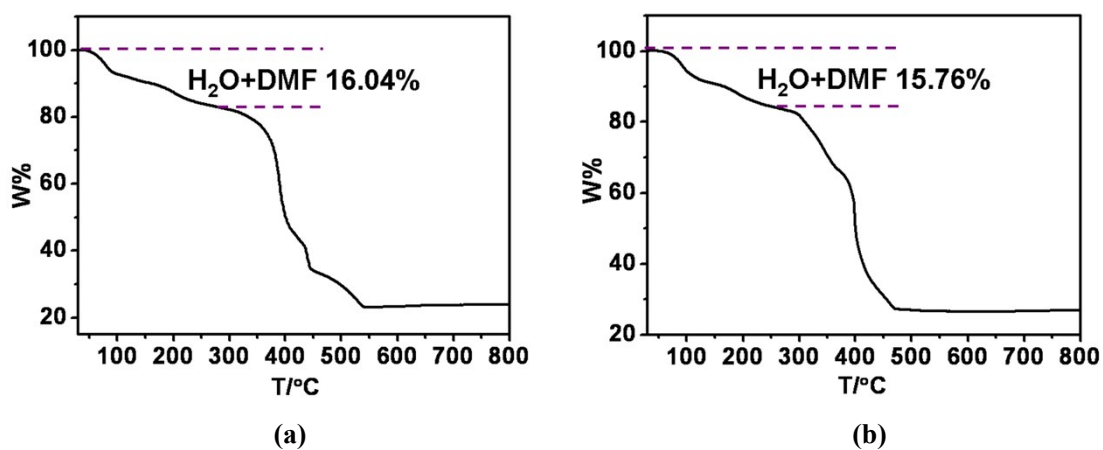

Fig.S4. TGA curves of compounds 1 (a) and 2 (b).

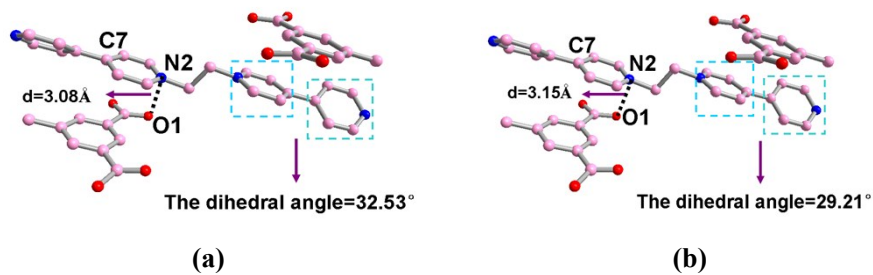

Fig.S5. The orientation diagrams of  $mip^{2-}$  ligands and  $Bpyen^{2+}$  ligands in compounds **1** (a) and **2** (b).

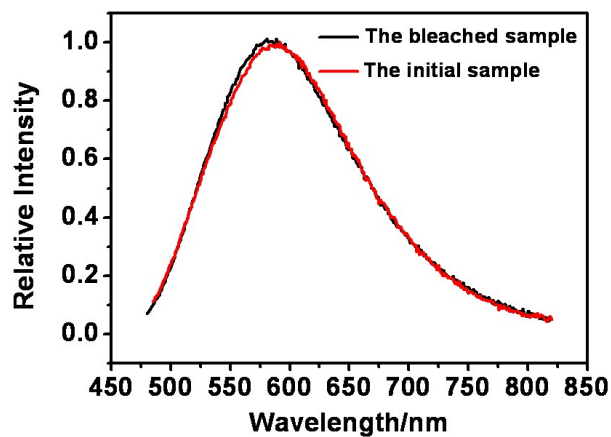

Fig.S6. The luminescence emission spectra of initial sample (red) and bleached sample (dark).

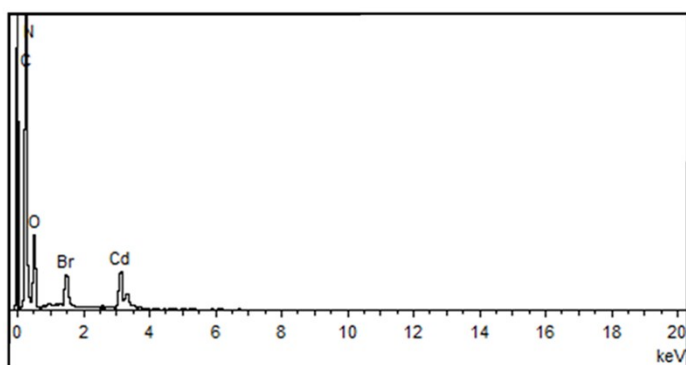

(a)

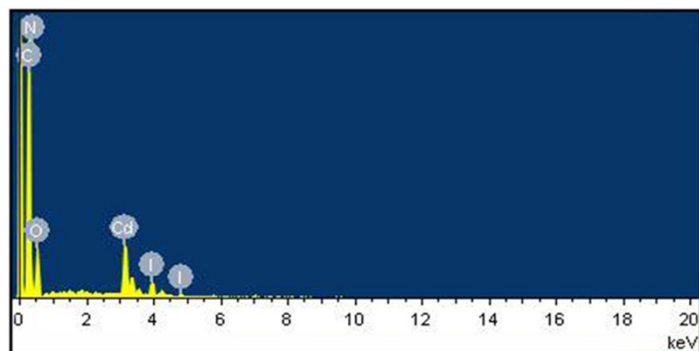

(b)

Fig.S7. Energy-dispersive X-ray spectroscopy analysis of compounds **1** (a), **2** (b) confirms the existence of elements Br or I in the structure, respectively.
